# Supplementary material for: Directed covalent assembly of rigid organic nanodisks using self-assembled temporary scaffolds
Source: Royal Society of Chemistry journal article supplement (doi:10.1039/b817598e), 2009-01-01
Supplement: b817598e.pdf [file b817598e.pdf]

## Directed Covalent Assembly of Rigid Organic Nanodisks Using Self-Assembled Temporary Scaffolds

Samuel Tekobo and Eugene Pinkhassik

### Supporting Information

#### Materials and Methods

DMPC and DHPC were purchased from Avanti Lipids Inc. Styrene and divinylbenzene were purchased from Sigma-Aldrich. Lucirin TPO was purchased from BASF Aktiengesellschaft (Germany).

*UV spectra of styrene and divinylbenzene.* Styrene or divinylbenzene were added to water and allowed to diffuse at ambient temperature for 30 minutes. Solubility of styrene in water was previously reported to be 0.031-0.033 %, <sup>[1]</sup> which is sufficient to obtain a UV spectrum. UV measurements were performed on an Agilent 8453 UV-vis spectrophotometer. Spectra of divinylbenzene in bicelles and in water are shown on Figure S1. Divinylbenzene exhibits similar spectral behavior to styrene (Figure 2 of main manuscript) when transferred from polar to non-polar environment.

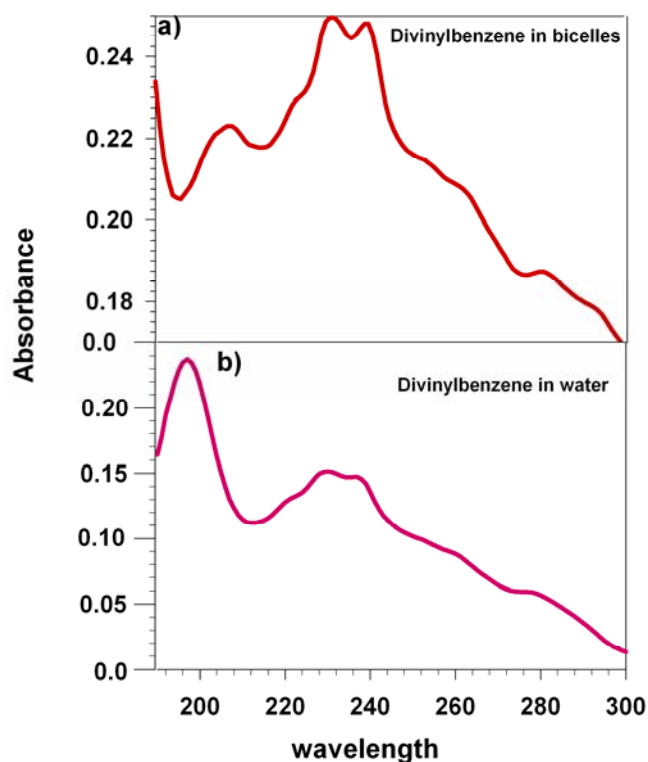

Figure S1. UV spectra of divinylbenzene in: a) bicelle solution and b) water.

<sup>[1]</sup> W.H. Lane, *Ind. Eng. Chem. Anal. Ed.*, 1946, **18**, 295-296

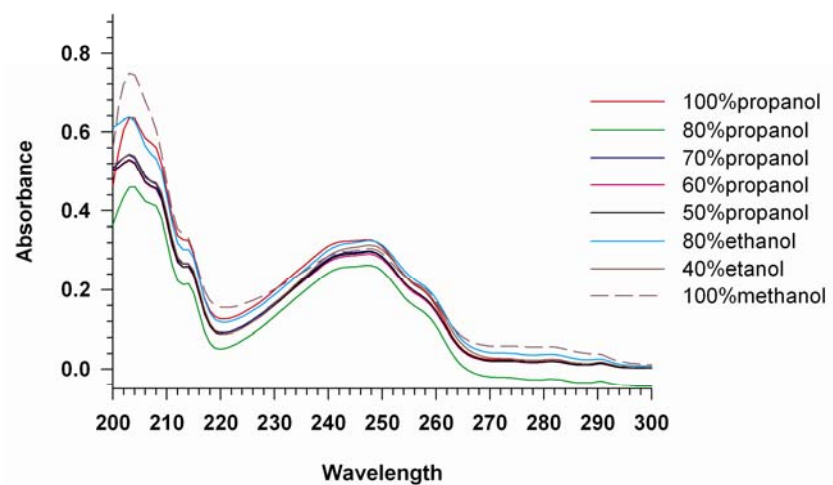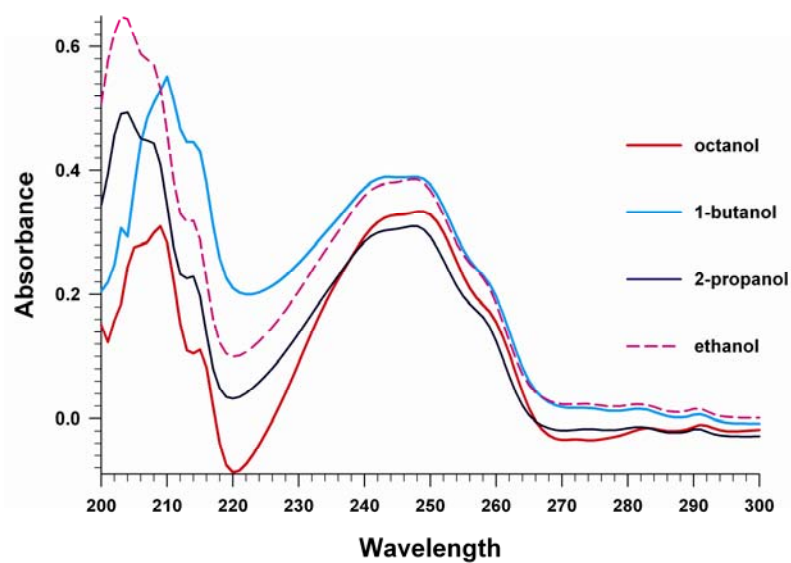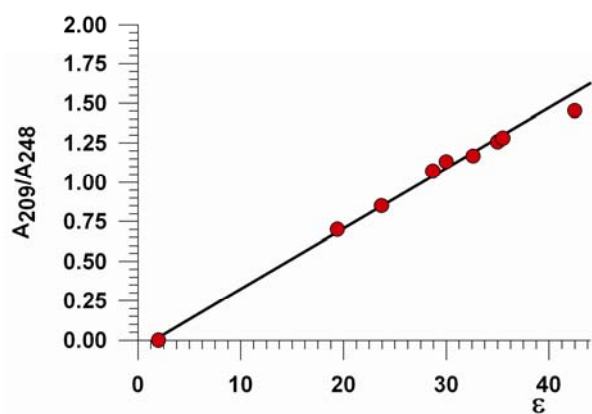

**Figure S2.** UV spectra of styrene in solvents with different polarity and a calibration curve used to calculate the dielectric constant for styrene in bicelle solution. Data points on the curve are taken from the spectra above and literature values for dielectric constants.

*Measurements of monomers by gas chromatography (GC).* After incubation of bicelles with styrene/divinylbenzene mixture, entrapped monomers were extracted with hexane and analyzed by GC as described previously.<sup>[2]</sup> For monomer/lipid ratios below 0.47, all monomers (within experimental error) used for the incubation with bicelles were found in the extract.

*Transmission electron microscopy (TEM):* TEM images were obtained with a JEOL JEM-1200EXII. The working voltage was 100kV. Samples were negatively stained with 2% phosphotungstic acid (pH 6.2). Before staining, the samples were adsorbed into 200-mesh carbon grid by carefully placing the grid on one drop of sample. A paper filter was then used to wipe away the excess of sample from the grid, which was subsequently placed on a drop of 2% phosphotungstic acid. After two minutes the grid was removed and the excess of liquid was carefully wiped with a filter paper.

*Scanning electron microscopy (SEM):* SEM images were obtained with a Philips XL 30ESEM instrument. Nanodisks samples were coated with 2nm Au-Pd layer using EMS 590 X sputter.

*Liquid Chromatography/Mass Spectrometry (LC-MS):* LC-MS measurements were carried out using LCQ Advantage system. The flow rate was set at 0.5mL/min, temperature was 300 °C, mobile phase was 2% glacial acetic acid in methanol, the ion source was electrospray ionization (ESI), the MS was set for positive ion identification. A sample containing polymerized nanodisks in the interior of DMPC/DHPC bicelles was placed in a culture tube, and thoroughly mixed with 10ml of methanol to dissolve the lipid shell and precipitate the nanodisks. After centrifugation at 4000 g for 5 min, the polymerized material precipitated and the upper methanol layer was collected for phospholipids analysis by LC-MS. The operation was repeated ten times. No lipids were found in methanol after the 5<sup>th</sup> washing step. The results of the LC-MS measurements are shown on Figure S3.

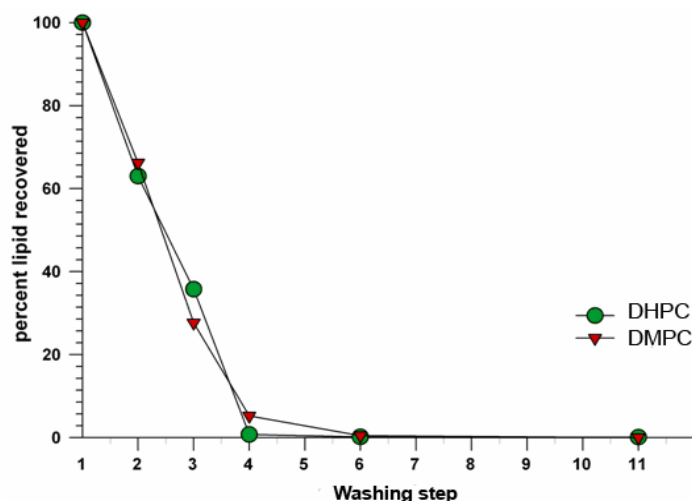

**Figure S3.** Lipids found in methanol by LC-MS after washing nanodisks. Lipid content in methanol after the first washing step is taken as 100%.

<sup>[2]</sup> L.T. Banner, D.C. Danila, K. Sharpe, M. Durkin, B. Clayton, B. Anderson, A. Richter, E. Pinkhassik, *Langmuir*, 2008, **24**, 11464-11473.

*Dynamic light scattering (DLS).* The disk sizes were measured using Dynapro<sup>TM</sup> Titan stand alone Dynamic Light Scattering instrument. Samples were prepared by dispersing a small amount (~1 mg) of nanodisk powder in 10 mL of toluene and sonicating the suspension for 0.5 - 1 min. This stock suspension was diluted 10-100 fold prior to measurements.

To study the stability of nanodisks suspension in toluene, DLS measurements were performed after storing a suspension for two weeks at ambient conditions. DLS data, shown on Figure S4, support long-term stability of a monodisperse suspension of nanodisks in toluene.

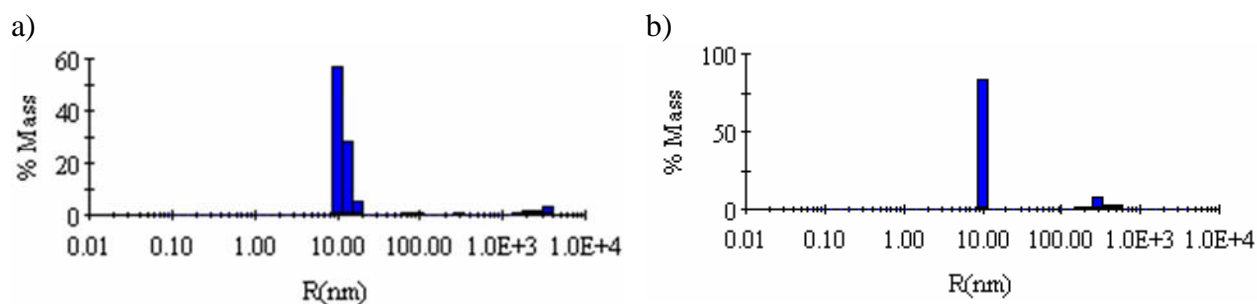

**Figure S4.** DLS data for nanodisks suspension in toluene: a) immediately after preparation and b) after two-week storage at ambient conditions.
